# Supplementary material for: Photo-degradation of atmospheric chromophores: typeconversion and changes in photochemical reactivity
Source: Copernicus journal article supplement (doi:10.5194/acp-2020-1223), 2020-12-08
Supplement: Supplementary file 1 [file acp-2020-1223-supplement.pdf]

## Supporting Information

Photo-degradation of atmospheric chromophores: type conversion and changes in photochemical reactivity

Zhen Mu<sup>a</sup>, Qingcai Chen<sup>a\*</sup>, Lixin Zhang<sup>a</sup>, Dongjie Guan<sup>a</sup> and Hao Li<sup>a</sup>

*<sup>a</sup> School of Environmental Science and Engineering, Shaanxi University of Science and Technology, Xi'an 710021, China*

\*Corresponding authors:

\*(Q. C.) Phone: (+86) 0029-86132765; e-mail: chenqingcai@sust.edu.cn; School of Environmental Science and Engineering, Shaanxi University of Science and Technology, Weiyang District, Xi'an, Shaanxi, 710021, China;

### **Content:**

Number of pages: 14;

Text S1: Calculation of optical characteristics of WSOM/WISOM;

Tables: 3;

Figures: 8.

## Text 1. Calculation of optical characteristics of WSOM/WISOM

The mass absorption coefficient (MAE) of the extraction is calculated, Calculated formula as follows:

$$\text{MAE (m}^2 \cdot \text{g}^{-1}) = \frac{A}{C \times L} \quad (1)$$

In (1), A is the absorption of the extraction at the wavelength of 365 nm, C is the detected concentration of the extraction ( $\mu\text{g/mL}$ ), and L is the path length of light (according to the cuvette, it is determined as 1 cm).

Absorption Ångström exponent is calculated (AAE) using the following calculation:

$$\text{AAE} = \frac{-\ln(A(\lambda_1)/A(\lambda_2))}{\ln(\lambda_1/\lambda_2)} \quad (2)$$

In (2),  $\lambda_1$  and  $\lambda_2$  are the selected wavelengths in the wavelength range with obvious wavelength-dependent characteristics.

$E_2/E_3$  is calculated using the following relation:

$$E_2/E_3 = \text{MAE}_{250}/\text{MAE}_{365} \quad (3)$$

**Table S1.** Details of primary organic aerosol (POA) and ambient particulate matter (ambient PM).

| POA       |                 |                       | Ambient PM |               |                 |                  |
|-----------|-----------------|-----------------------|------------|---------------|-----------------|------------------|
| Sample ID | Sample category | Combustion quantity/g | Sample ID  | Sampling Date | Sampling Season | Illustration     |
| 1         | Wheat Straw     | 2.4860                | 9          | 2017-4-18     | Spring          | Sand Storm       |
| 2         |                 | 2.4869                | 10         | 2017-4-19     |                 |                  |
| 3         | Corn Straw      | 2.4865                | 11         | 2017-1-3      | Winter          | Heavy pollution  |
| 4         |                 | 2.4863                | 12         | 2019-1-4      |                 |                  |
| 5         | Rice Straw      | 2.4873                | 13         | 2017-7-3      | Summer          | Good Air Quality |
| 6         |                 | 2.4870                | 14         | 2017-7-4      |                 |                  |
| 7         | Wood            | 5.0364                | 15         | 2017-11-5     | Autumn          | Slight pollution |
| 8         |                 | 5.0326                | 16         | 2019-11-6     |                 |                  |

**Table S2.** OC concentration of samples for optical analysis.

| POA       |                  |                   | Ambient PM |                  |                   |
|-----------|------------------|-------------------|------------|------------------|-------------------|
| Sample ID | <i>cwsoc/ppm</i> | <i>cwisoc/ppm</i> | Sample ID  | <i>cwsoc/ppm</i> | <i>cwisoc/ppm</i> |
| 1-0h      | 2.99             | 6.86              | 9-0h       | 59.12            | 7.42              |
| 1-2h      | 2.91             | 2.87              | 9-2h       | 65.85            | 5.48              |
| 1-6h      | 3.13             | 2.52              | 9-6h       | 67.39            | 8.30              |
| 1-12h     | 3.51             | 2.67              | 9-12h      | 55.90            | 6.36              |
| 1-24h     | 3.76             | 2.68              | 9-24h      | 54.41            | 7.20              |
| 1-3d      | 3.02             | 2.15              | 9-3d       | 76.46            | 4.41              |
| 1-7d      | 3.00             | 2.24              | 9-7d       | 63.24            | 2.95              |
| 2-0h      | 3.60             | 2.96              | 10-0h      | 52.97            | 3.52              |
| 2-2h      | 4.19             | 2.85              | 10-2h      | 54.92            | 7.25              |
| 2-6h      | 4.00             | 3.22              | 10-6h      | 61.99            | 7.12              |
| 2-12h     | 3.60             | 0.73              | 10-12h     | 53.09            | 4.94              |
| 2-24h     | 4.13             | 3.78              | 10-24h     | 48.29            | 4.68              |
| 2-3d      | 3.38             | 4.46              | 10-3d      | 48.15            | 4.01              |
| 2-7d      | 3.31             | 2.64              | 10-7d      | 53.70            | 3.82              |
| 3-0h      | 5.86             | 3.15              | 11-0h      | 6.62             | 2.79              |
| 3-2h      | 6.13             | 3.31              | 11-2h      | 4.99             | 4.61              |
| 3-6h      | 6.31             | 5.26              | 11-6h      | 4.10             | 4.22              |
| 3-12h     | 6.20             | 2.51              | 11-12h     | 5.01             | 1.67              |
| 3-24h     | 5.19             | 5.44              | 11-24h     | 5.59             | 2.84              |
| 3-3d      | 5.02             | 4.09              | 11-3d      | 3.66             | 0.47              |
| 3-7d      | 4.70             | 4.90              | 11-7d      | 5.34             | 1.08              |
| 4-0h      | 4.22             | 2.40              | 12-0h      | 5.65             | 3.62              |
| 4-2h      | 4.40             | 2.90              | 12-2h      | 3.75             | 3.81              |
| 4-6h      | 4.02             | 2.90              | 12-6h      | 7.15             | 4.38              |
| 4-12h     | 3.15             | 5.38              | 12-12h     | 4.98             | 3.17              |
| 4-24h     | 3.94             | 2.62              | 12-24h     | 4.54             | 2.92              |
| 4-3d      | 3.22             | 2.98              | 12-3d      | 4.03             | 1.42              |
| 4-7d      | 3.29             | 2.30              | 12-7d      | 5.84             | 1.45              |
| 5-0h      | 5.02             | 2.24              | 13-0h      | 59.68            | 2.90              |
| 5-2h      | 4.74             | 3.82              | 13-2h      | 57.95            | 3.71              |
| 5-6h      | 5.26             | 4.02              | 13-6h      | 50.79            | 5.19              |
| 5-12h     | 5.46             | 3.94              | 13-12h     | 52.57            | 3.24              |
| 5-24h     | 5.21             | 4.13              | 13-24h     | 54.15            | 1.34              |
| 5-3d      | 4.72             | 4.85              | 13-3d      | 55.65            | <LOD              |
| 5-7d      | 3.67             | 3.53              | 13-7d      | 55.99            | <LOD              |
| 6-0h      | 5.23             | 2.46              | 14-0h      | 58.12            | 1.86              |
| 6-2h      | 5.52             | 2.58              | 14-2h      | 47.04            | 4.06              |
| 6-6h      | 4.49             | 4.50              | 14-6h      | 48.95            | 2.13              |
| 6-12h     | 4.28             | 3.72              | 14-12h     | 49.47            | 2.80              |
| 6-24h     | 4.23             | 3.76              | 14-24h     | 39.93            | 3.70              |
| 6-3d      | 4.01             | 4.14              | 14-3d      | 29.66            | 0.63              |
| 6-7d      | 3.64             | 3.42              | 14-7d      | 49.12            | 0.59              |
| 7-0h      | 9.66             | 3.59              | 15-0h      | 42.22            | 2.67              |
| 7-2h      | 6.75             | 3.88              | 15-2h      | 32.35            | ---               |
| 7-6h      | 8.24             | 4.23              | 15-6h      | 26.49            | 4.96              |

**Table S2** (continued)

| POA       |                  |                   | Ambient PM |                  |                   |
|-----------|------------------|-------------------|------------|------------------|-------------------|
| Sample ID | <i>cwsoc/ppm</i> | <i>cwisoc/ppm</i> | Sample ID  | <i>cwsoc/ppm</i> | <i>cwisoc/ppm</i> |
| 7-12h     | 9.33             | 4.26              | 15-12h     | 32.87            | 1.62              |
| 7-24h     | 7.62             | 4.06              | 15-24h     | 26.60            | 2.60              |
| 7-3d      | 7.23             | 3.70              | 15-3d      | 26.04            | ---               |
| 7-7d      | 6.37             | 5.21              | 15-7d      | 33.67            | 3.06              |
| 8-0h      | 9.43             | 4.02              | 16-0h      | 38.66            | 0.93              |
| 8-2h      | 9.34             | 2.24              | 16-2h      | 27.01            | 3.07              |
| 8-6h      | 9.34             | 4.47              | 16-6h      | 29.22            | 2.56              |
| 8-12h     | 9.13             | 4.30              | 16-12h     | 31.84            | 1.24              |
| 8-24h     | 8.51             | 4.41              | 16-24h     | 44.70            | 1.19              |
| 8-3d      | 6.90             | 5.54              | 16-3d      | 27.32            | 0.27              |
| 8-7d      | 7.09             | 4.83              | 16-7d      | 50.43            | 1.05              |

**Table S3.** Concentration of water-soluble organic carbon (WSOC) exaction for triplet state formation experiment.

| POA       |                  | Ambient PM |                  |
|-----------|------------------|------------|------------------|
| Sample ID | <i>cwsoc/ppm</i> | Sample ID  | <i>cwsoc/ppm</i> |
| 1-0h      | 14.98            | 9-0h       | 14.78            |
| 1-7d      | 15.01            | 9-7d       | 15.82            |
| 2-0h      | 14.40            | 10-0h      | 13.25            |
| 2-7d      | 13.24            | 10-7d      | 13.43            |
| 3-0h      | 16.73            | 11-0h      | 16.56            |
| 3-7d      | 13.44            | 11-7d      | 13.35            |
| 4-0h      | 16.89            | 12-0h      | 14.14            |
| 4-7d      | 13.15            | 12-7d      | 14.60            |
| 5-0h      | 16.75            | 13-0h      | 14.92            |
| 5-7d      | 14.70            | 13-7d      | 14.00            |
| 6-0h      | 14.95            | 14-0h      | 14.53            |
| 6-7d      | 14.57            | 14-7d      | 12.29            |
| 7-0h      | 19.33            | 15-0h      | 10.56            |
| 7-7d      | 15.92            | 15-7d      | 8.42             |
| 8-0h      | 18.87            | 16-0h      | 9.67             |
| 8-7d      | 14.18            | 16-7d      | 12.61            |

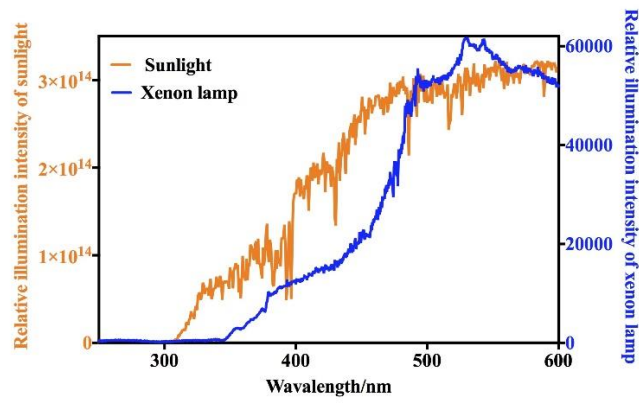

**Figure S1.** Wavelength spectrum of Xenon lamp. Relative irradiance data of xenon lamp is from perfect light Inc. Relative irradiance data of sunlight is from *The Tropospheric Visible Ultra-Violet (TUV) model web page*. Input parameters for the TUV model were: Longitude: E108°58'34.58", Latitude: N34°22'35.07", measurement altitude: 0.02 km, surface albedo: 0.1, aerosol optical depth: 0.235, cloud optical depth: 0.00.

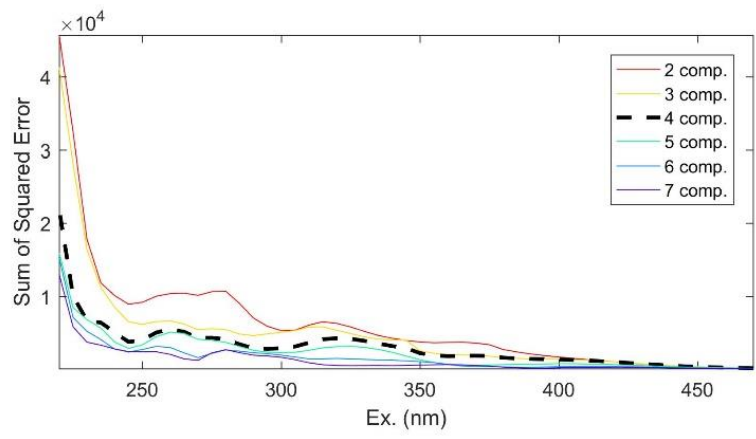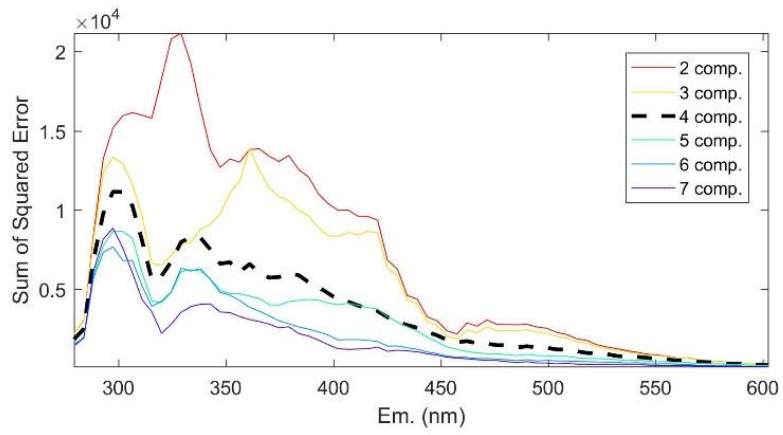

**Figure S2.** Analysis error of PARAFAC model.



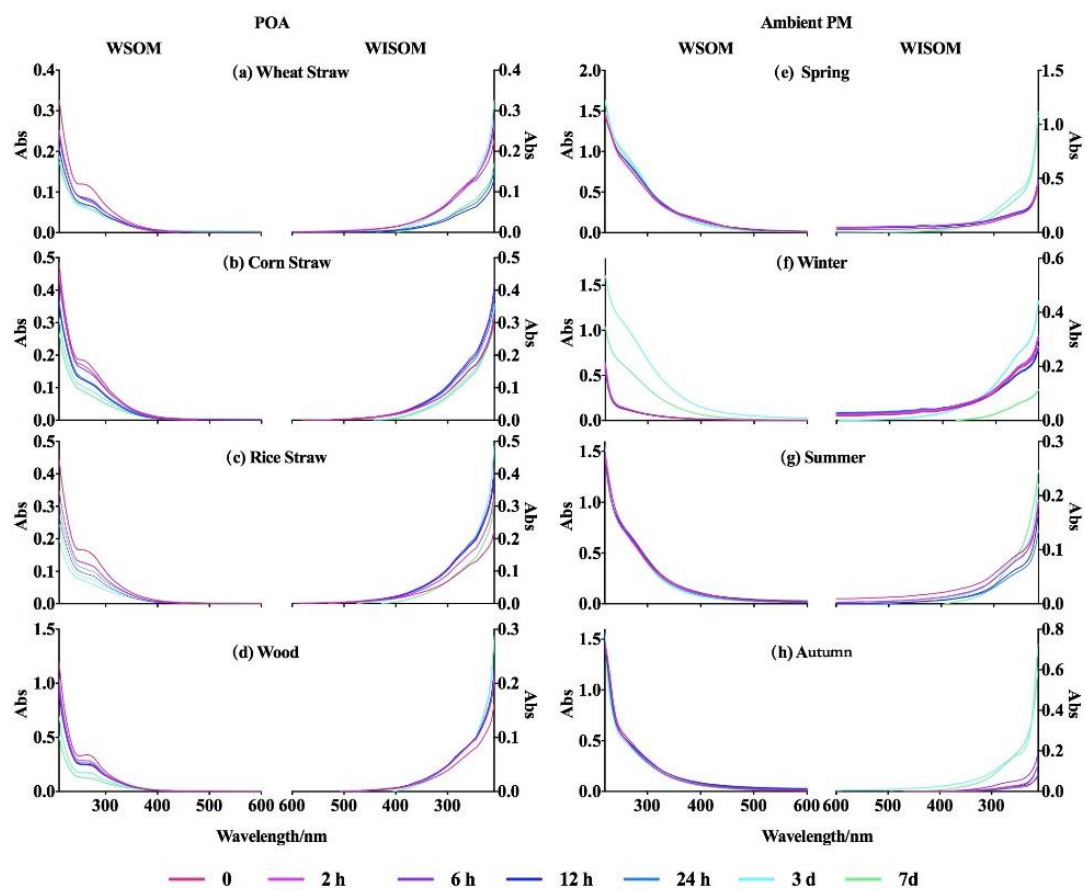

**Figure S3.** Absorption spectra of POA and ambient PM during the photo-aging process.

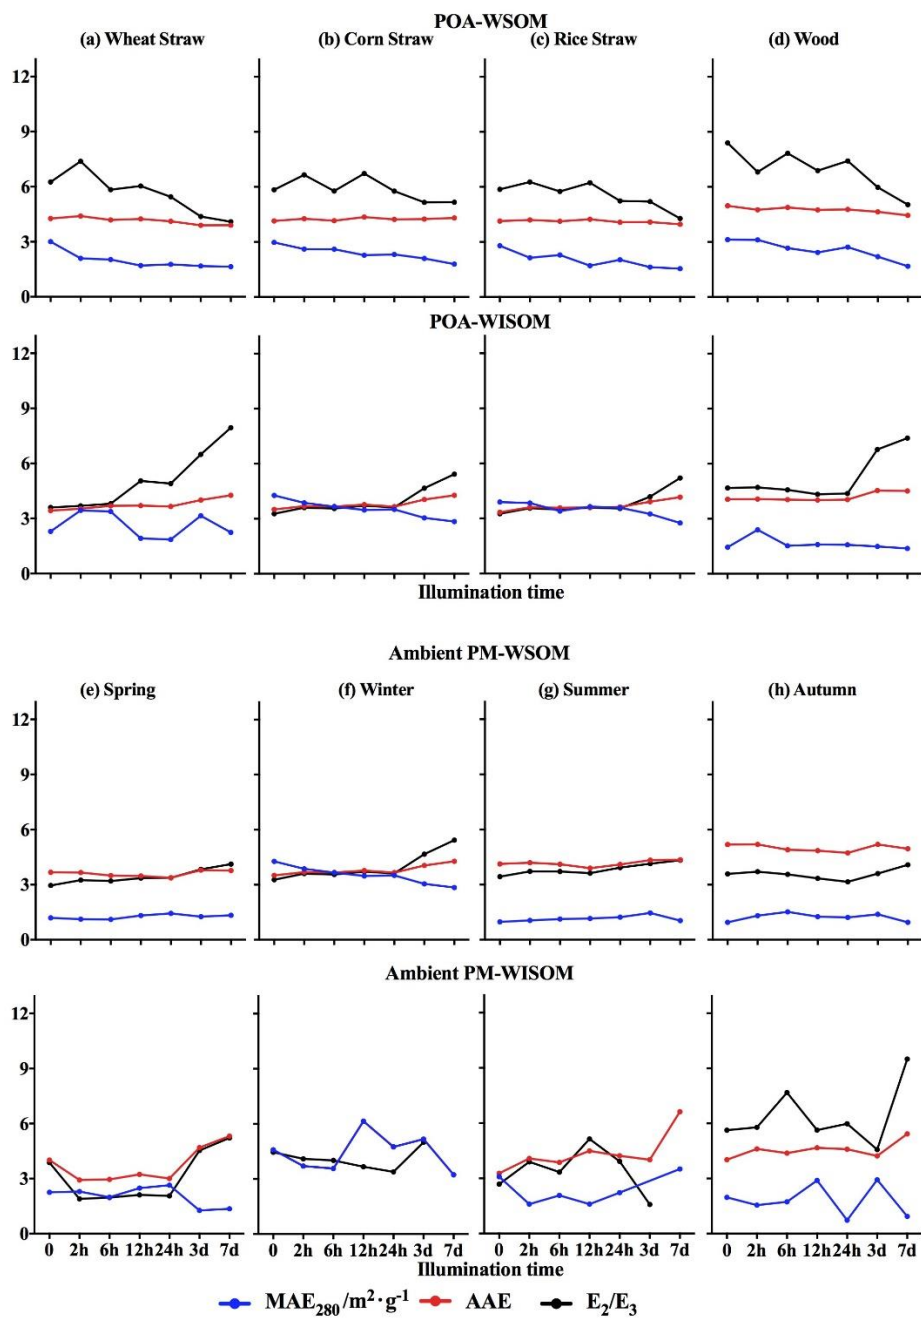

Figure S4. Optical characteristics of  $E_2/E_3$ , AAE and MAE of POA and ambient PM.

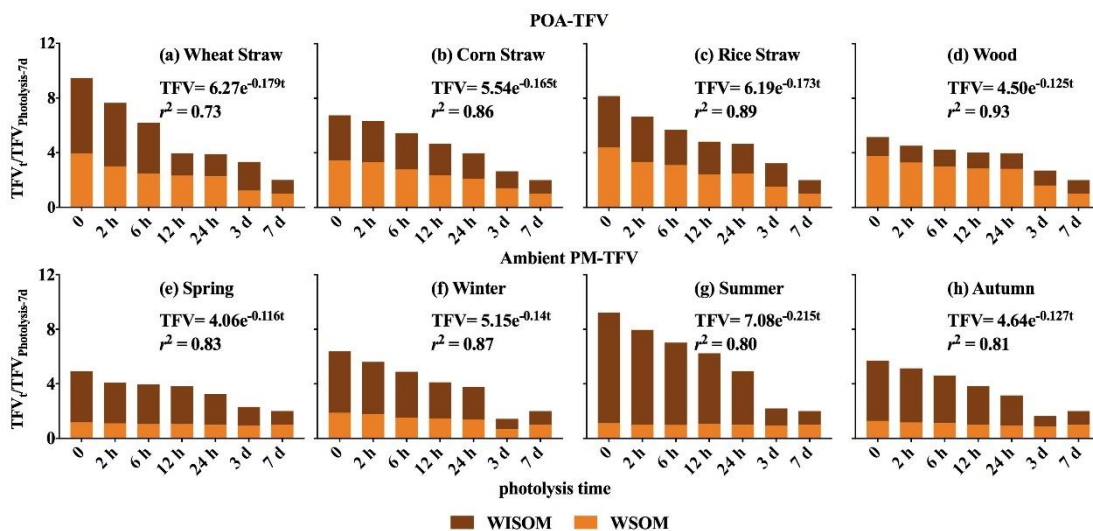

**Figure S5.** Characteristic of fluorescence volume attenuation in POA and ambient PM samples during the photo-aging process.

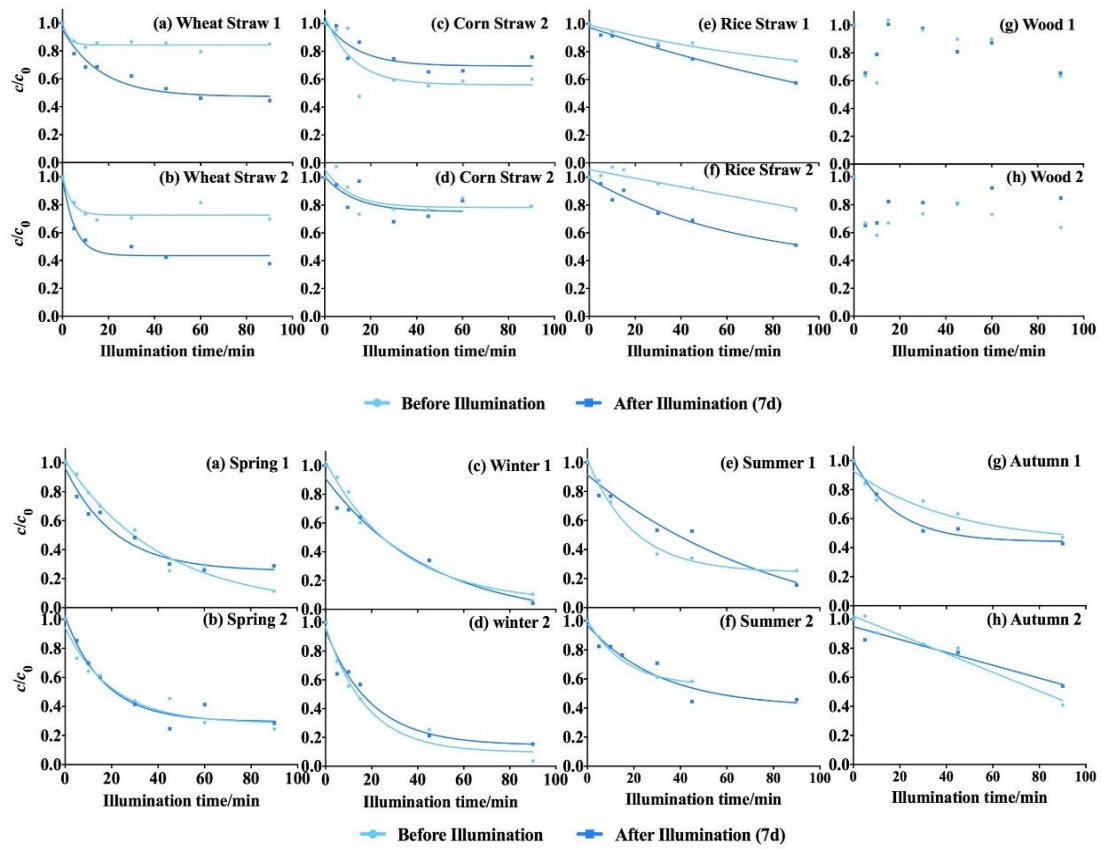

Figure S6. Formation characteristic of triplet state of POA and ambient PM samples.

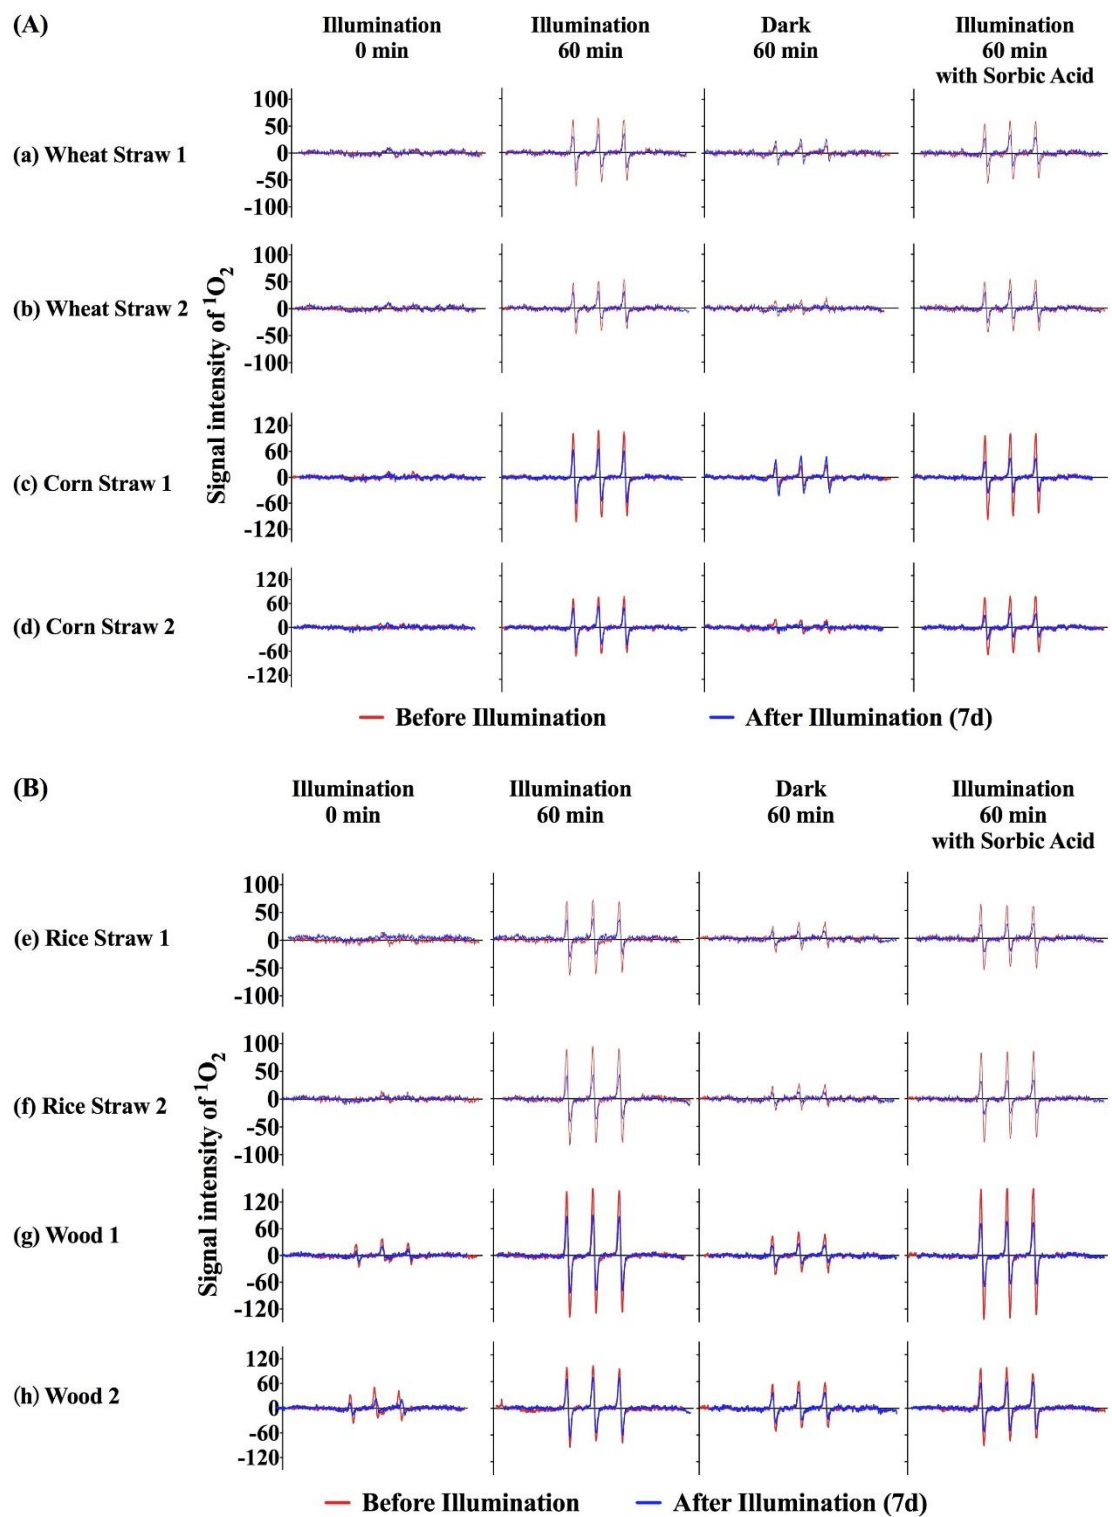

Figure S7. Characteristic of  $^3\text{CDOM}^*$  formation of POA driving  $^1\text{O}_2$ .

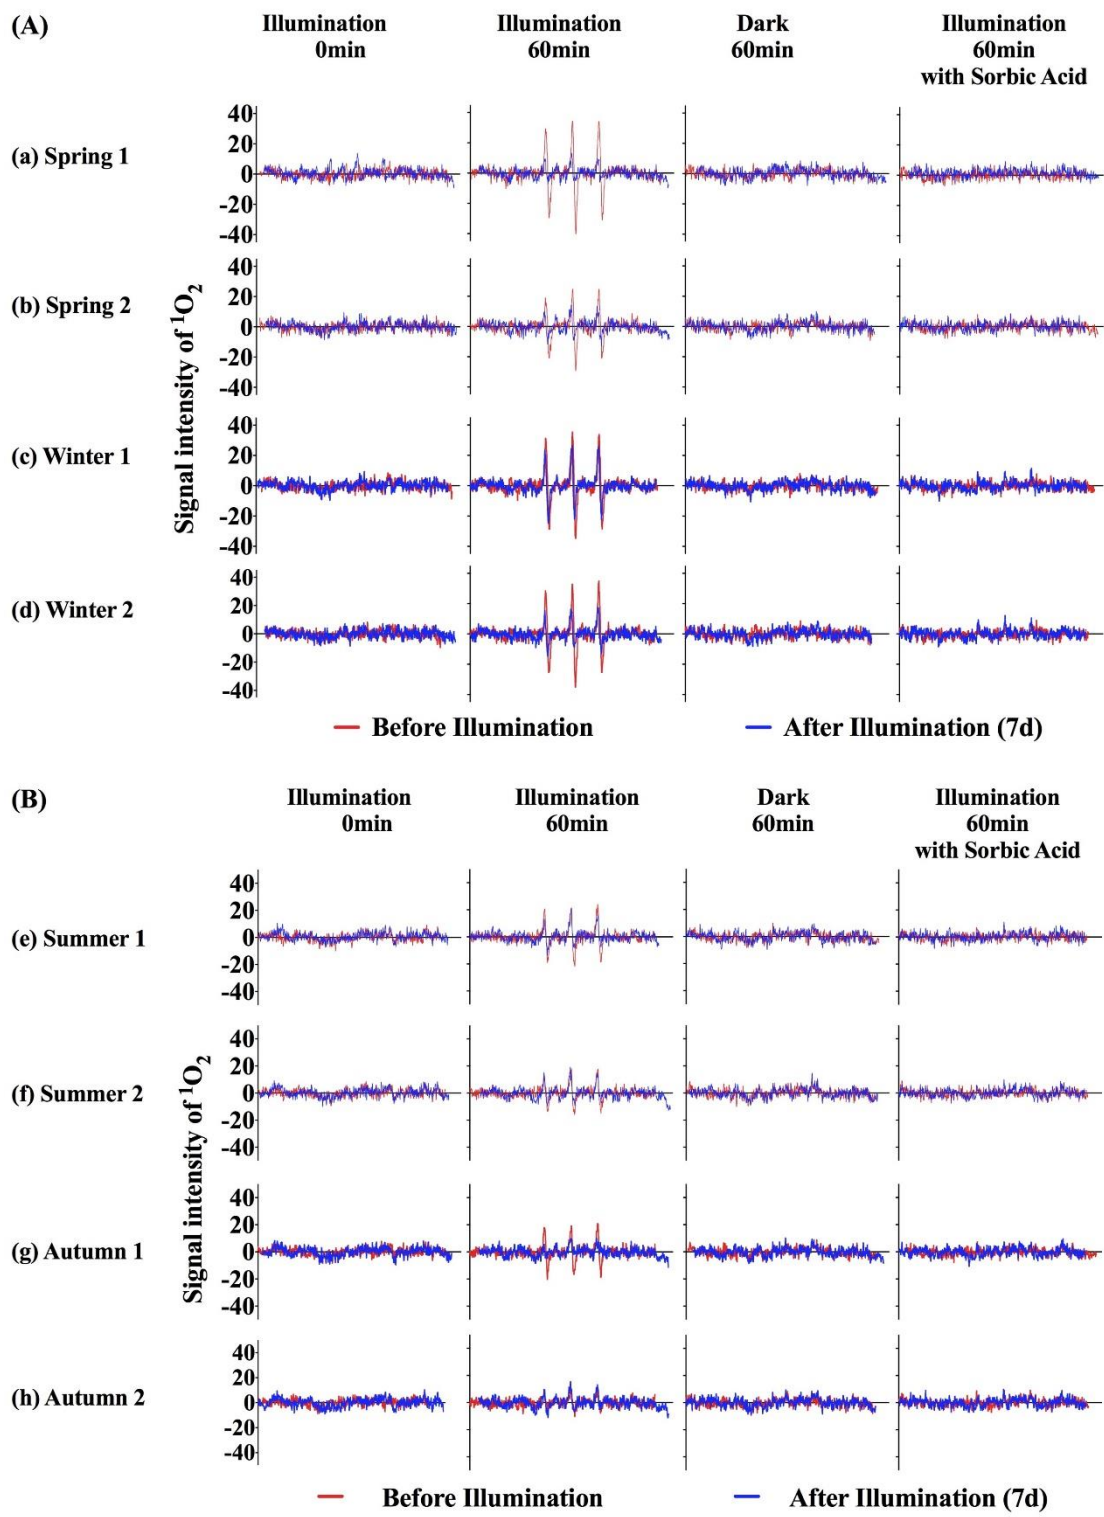

Figure S8. Characteristic of <sup>3</sup>CDOM\* formation of ambient PM driving <sup>1</sup>O<sub>2</sub>.
